# Supplementary material
Source: publisher figshare collection journal article supplement (https://acs.figshare.com/ndownloader/files/5805045)
Supplement: Supplementary file 1 [file 5805045]

#### Terms & Conditions

Electronic Supporting Information files are available without a subscription to ACS Web Editions. The American Chemical Society holds a copyright ownership interest in any copyrightable Supporting Information. Files available from the ACS website may be downloaded for personal use only. Users are not otherwise permitted to reproduce, republish, redistribute, or sell any Supporting Information from the ACS website, either in whole or in part, in either machine-readable form or any other form without permission from the American Chemical Society. For permission to reproduce, republish and redistribute this material, requesters must process their own requests via the RightsLink permission system. Information about how to use the RightsLink permission system can be found at <http://pubs.acs.org/page/copyright/permissions.html>

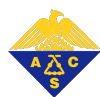

**ACS Publications**  
MOST TRUSTED. MOST CITED. MOST READ.

Fluorobenzene possesses some remarkable properties. For example, the solubility of  $O_2$  in  $FC_6H_5$  is greater than for other alkylbenzene or monohalobenzene derivatives. The relative solubility of  $O_2$  in toluene is 8.77 as compared to 15.08 for  $FC_6H_5$  (Naumenko, N. V.; Mukhin, N. N.; Aleskovikii, V. B. *Zh. Prikl. Khim. (Leningrad)* 1969, 42, 2522). Furthermore, fluorobenzene possesses unusual solvent property parameters and is more polar than toluene. The following data were measured at Zeneca Ltd.

| parameters <sup>a</sup> | toluene | fluorobenzene |
|-------------------------|---------|---------------|
| Gutmann donor no.       | 0.1     | 3.00          |
| dipole moment           | 1.0     | 4.90          |
| dielectric constant     | 2.38    | 5.42          |
| $E_T(30)$               | 33.9    | 37            |
| solvatochromic $\pi^*$  | 0.54    | 0.62          |

Like most aromatic solvents, fluorobenzene is highly flammable ( $F_p = -12^\circ C$ ). It is irritant to the skin and can cause serious damage to the eyes. It is only weakly toxic by inhalation (rat;  $LC_{50} = 27$  mg/L) and even less by ingestion (rat;  $LC_{50} = 4000$  mg/L). On large-scale experiments, it can be easily recycled by drying and distillation.

#### Typical Experimental Procedure. Oxidation of ( $\pm$ )-Borneol.

Fluorobenzene (100 mL), CuCl (160 mg, 1.62 mmol, 5 mol %) and phenanthroline (292 mg, 1.62 mmol, 5 mol %) were added to a 200 mL two-necked flask fitted with a reflux condenser and an air inlet tube. After the mixture was stirred for 15 min at rt,  $K_2CO_3$  (1.1 g, 8.1 mmol, 25 mol %) and DBAD (373 mg, 1.62 mmol, 5 mol %) were added, and the stirring was continued for another 5 min. Borneol (5 g, 32.4 mmol), dissolved in 60 mL of fluorobenzene, was then added over 5 min. A gentle flow of oxygen was passed through the reaction mixture, which was heated at reflux for 5.5 h. After being cooled to rt, the black suspension was filtered through a pad of celigel (15 g of Celite mixed with 5 g of silica gel). The celigel was washed four times with 100 mL of  $CH_2Cl_2$ . The solution was decolorized with charcoal, and the solvent was removed under vacuum. The crude product (5.9 g) was dissolved in 15 mL of pentane and recrystallized at  $-78^\circ C$  to yield 3.67 g of camphor. A second crystallization from the concentrated mother liquor yielded another 0.57 g of camphor (total amount: 4.24 g, 86%, mp  $173-175^\circ C$  (authentic sample mp  $175^\circ C$ )).
